# Supplementary material for: Frailty and comorbidity in predicting community COVID‐19 mortality in the U.K. Biobank: The effect of sampling
Source: PubMed Central journal article supplement — J Am Geriatr Soc. 2021 Mar 5;69(5):1128–39. doi: 10.1111/jgs.17089 (PMC8013405; doi:10.1111/jgs.17089), 2021-03-05
Supplement: JGS-69-1128-s001.pdf [file JGS-69-1128-s001.pdf]

## Supplemental File

### Frailty and comorbidity in predicting community COVID-19 mortality in the UK Biobank: the effect of sampling

Jonathan K. L. Mak<sup>1\*</sup>, Ralf Kuja-Halkola<sup>1</sup>, Yunzhang Wang<sup>1</sup>, Sara Hägg<sup>1</sup>, Juulia Jylhävä<sup>1</sup>

<sup>1</sup> Department of Medical Epidemiology and Biostatistics, Karolinska Institutet, Stockholm, Sweden

\*Corresponding author: Jonathan K. L. Mak

Department of Medical Epidemiology and Biostatistics, Karolinska Institutet, Nobels väg 12A, 171 65 Stockholm, Sweden

Email: jonathan.mak@ki.se

#### Table of Contents

|                                                                                                                                                                                        |    |
|----------------------------------------------------------------------------------------------------------------------------------------------------------------------------------------|----|
| Supplementary Figure S1. Flowchart of selection of the study samples from the UK Biobank .....                                                                                         | 2  |
| Supplementary Figure S2. Assessment timeline in the UK Biobank .....                                                                                                                   | 3  |
| Supplementary Table S1. List of the five frailty criteria for construction of the physical frailty phenotype ....                                                                      | 4  |
| Supplementary Table S2. List of the 49 frailty items and scoring for construction of the frailty index .....                                                                           | 5  |
| Supplementary Table S3. List of the 109 ICD-10 codes and assigned weights for construction of the Hospital Frailty Risk Score .....                                                    | 6  |
| Supplementary Table S4. List of the 17 comorbidities, assigned weights and associated ICD-10 codes for construction of Charlson Comorbidity Index .....                                | 8  |
| Supplementary Table S5. Characteristics of individuals with and without hospital data.....                                                                                             | 9  |
| Supplementary Table S6. Spearman's rank correlation coefficients among different frailty and comorbidity measures .....                                                                | 10 |
| Supplementary Table S7. Associations of the different frailty and comorbidity measures with being COVID-19 positive and COVID-19 inpatient.....                                        | 11 |
| Supplementary Table S8. Predictive accuracies of age, sex, frailty and comorbidity measures for COVID-19 mortality in the full sample and COVID-19 inpatients .....                    | 12 |
| Supplementary Table S9. Associations of the different frailty and comorbidity measures with mortality due to COVID-19 and other causes in the full sample and COVID-19 inpatients..... | 13 |

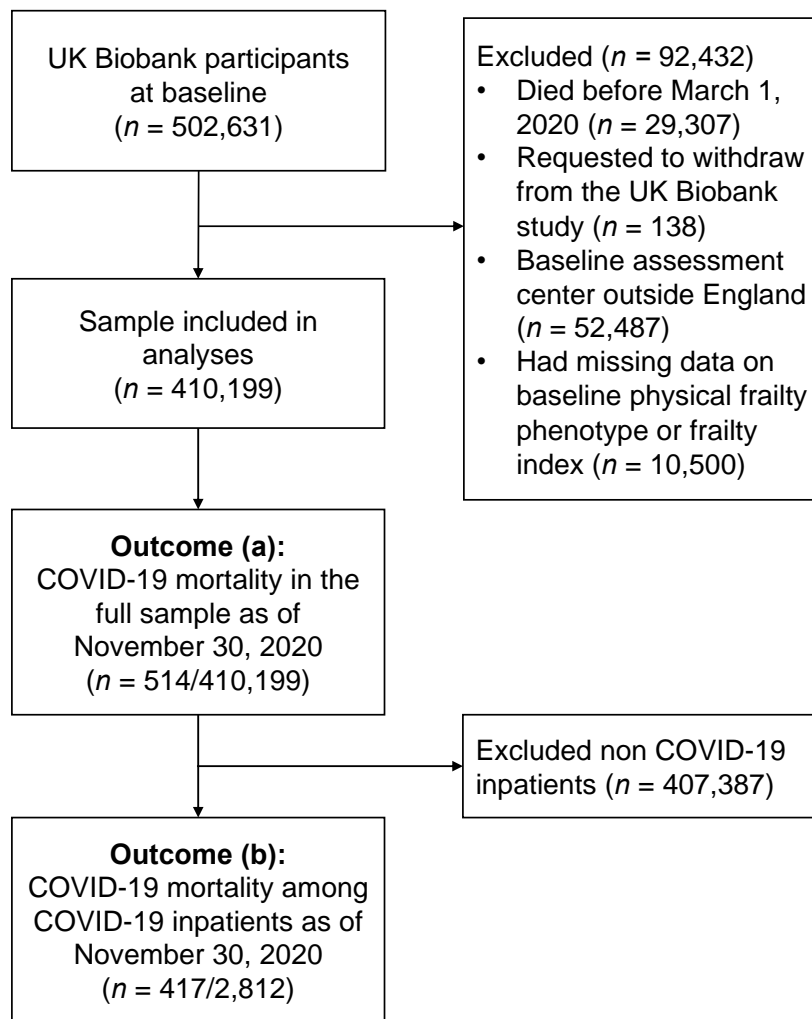

**Supplementary Figure S1.** Flowchart of selection of the study samples from the UK Biobank

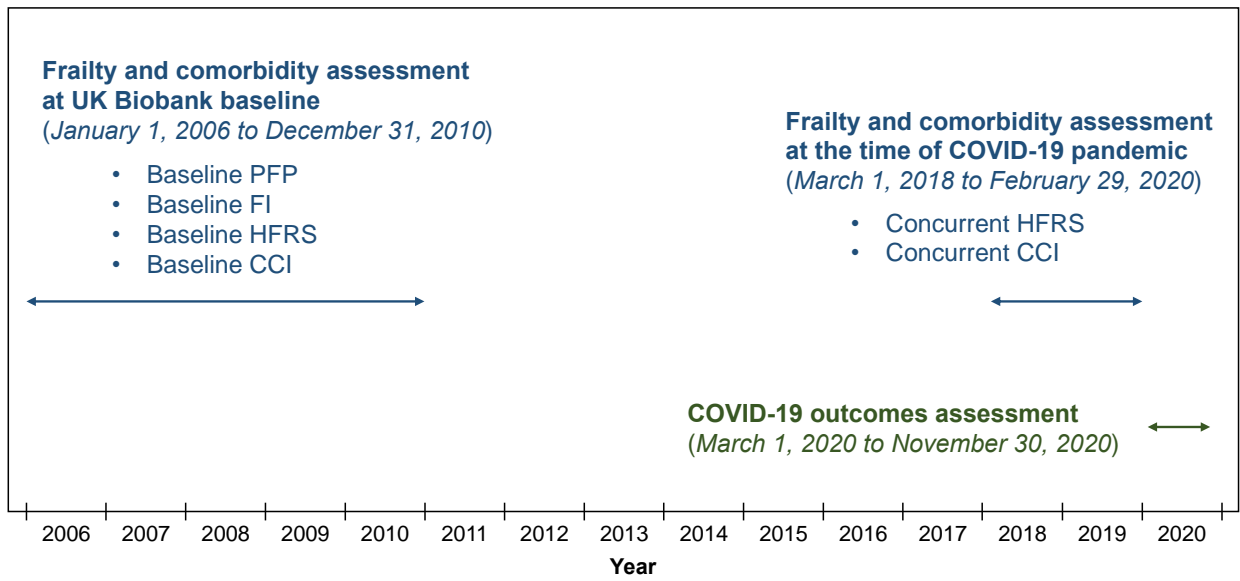

**Supplementary Figure S2.** Assessment timeline in the UK Biobank

Abbreviations: *CCI*, Charlson Comorbidity Index; *FI*, frailty index; *HFRS*, Hospital Frailty Risk Score; *PFP*, physical frailty phenotype

**Supplementary Table S1.** List of the five frailty criteria for construction of the physical frailty phenotype

| Frailty criteria      | Measurement                                                                                                                                                                                                                                                                                                                                                                                                                              | Scoring                                                                                                                                                                                                                                                                                       |
|-----------------------|------------------------------------------------------------------------------------------------------------------------------------------------------------------------------------------------------------------------------------------------------------------------------------------------------------------------------------------------------------------------------------------------------------------------------------------|-----------------------------------------------------------------------------------------------------------------------------------------------------------------------------------------------------------------------------------------------------------------------------------------------|
| Weight loss           | Self-reported question:<br>“Compared with one year ago, has your weight changed?”                                                                                                                                                                                                                                                                                                                                                        | Yes, lost weight=1; other=0                                                                                                                                                                                                                                                                   |
| Exhaustion            | Self-reported question:<br>“Over the past two weeks, how often have you felt tired or had little energy?”                                                                                                                                                                                                                                                                                                                                | More than half the days or nearly every day=1; other=0                                                                                                                                                                                                                                        |
| Slowness              | Self-reported question:<br>“How would you describe your usual walking pace?”                                                                                                                                                                                                                                                                                                                                                             | Slow=1; other=0                                                                                                                                                                                                                                                                               |
| Low physical activity | Self-reported physical activity questionnaire, categorized into 4 levels:<br>(i) none – no physical activity in the last 4 weeks<br>(ii) low – light DIY activity (e.g., pruning, watering the lawn) only in the last 4 weeks<br>(iii) medium – heavy DIY activity (e.g., weeding, lawn mowing, carpentry and digging), walking for pleasure, or other exercises in the last 4 weeks<br>(iv) high – strenuous sports in the last 4 weeks | None or light activity with a frequency of once per week or less=1; medium or heavy activity, or light activity more than once per week=0                                                                                                                                                     |
| Weakness              | Measured grip strength                                                                                                                                                                                                                                                                                                                                                                                                                   | Sex and body mass index (BMI) adjusted cutoffs:<br><u>Men:</u><br>≤29 kg for BMI ≤24;<br>≤30 kg for BMI 24.1–26;<br>≤30 kg for BMI 26.1–28; or<br>≤32 kg for BMI >28<br><u>Women:</u><br>≤17 kg for BMI ≤23;<br>≤17.3 kg for BMI 23.1–26;<br>≤18 kg for BMI 26.1–29; or<br>≤21 kg for BMI >29 |

**Supplementary Table S2.** List of the 49 frailty items and scoring for construction of the frailty index

| #  | Frailty item                                                                            | Scoring                                                                 |
|----|-----------------------------------------------------------------------------------------|-------------------------------------------------------------------------|
| 1  | Glaucoma                                                                                | No=0; Yes=1                                                             |
| 2  | Cataracts                                                                               | No=0; Yes=1                                                             |
| 3  | Hearing difficulty                                                                      | No=0; Yes/completely deaf=1                                             |
| 4  | Migraine                                                                                | No=0; Yes=1                                                             |
| 5  | Dental problems (ulcers, painful gums, bleeding gums, loose teeth, toothache, dentures) | None=0; Any=1                                                           |
| 6  | Self-rated health                                                                       | Excellent=0; Good=0.25; Fair=0.5; Poor=1                                |
| 7  | Fatigue: frequency of tiredness/lethargy in last two weeks                              | Not at all=0; Several days=0.25; More than half=0.5; Nearly every day=1 |
| 8  | Sleep: experience of sleeplessness/insomnia                                             | Never/rarely=0; Sometimes=0.5; Usually=1                                |
| 9  | Depressed feelings: frequency in last two weeks                                         | Not at all=0; Several days=0.5; More than half=0.75; Nearly every day=1 |
| 10 | Self-described nervous personality                                                      | No=0; Yes=1                                                             |
| 11 | Severe anxiety/panic attacks                                                            | No=0; Yes=1                                                             |
| 12 | Common to feel loneliness                                                               | No=0; Yes=1                                                             |
| 13 | Sense of misery (ever/never)                                                            | No=0; Yes=1                                                             |
| 14 | Infirmity: long-standing illness or disability                                          | No=0; Yes=1                                                             |
| 15 | Falls in last year                                                                      | No falls=0; one fall=0.5; more than one=1                               |
| 16 | Fractures/broken bones in last five years                                               | No=0; Yes=1                                                             |
| 17 | Diabetes                                                                                | No=0; Yes=1                                                             |
| 18 | Myocardial infarction                                                                   | No=0; Yes=1                                                             |
| 19 | Angina                                                                                  | No=0; Yes=1                                                             |
| 20 | Stroke                                                                                  | No=0; Yes=1                                                             |
| 21 | High blood pressure                                                                     | No=0; Yes=1                                                             |
| 22 | Hypothyroidism                                                                          | No=0; Yes=1                                                             |
| 23 | Deep-vein thrombosis                                                                    | No=0; Yes=1                                                             |
| 24 | High cholesterol                                                                        | No=0; Yes=1                                                             |
| 25 | Breathing: wheeze in last year                                                          | No=0; Yes=1                                                             |
| 26 | Pneumonia                                                                               | No=0; Yes=1                                                             |
| 27 | Chronic bronchitis/emphysema                                                            | No=0; Yes=1                                                             |
| 28 | Asthma                                                                                  | No=0; Yes=1                                                             |
| 29 | Rheumatoid arthritis                                                                    | No=0; Yes=1                                                             |
| 30 | Osteoarthritis                                                                          | No=0; Yes=1                                                             |
| 31 | Gout                                                                                    | No=0; Yes=1                                                             |
| 32 | Osteoporosis                                                                            | No=0; Yes=1                                                             |
| 33 | Hay fever, allergic rhinitis or eczema                                                  | No=0; Yes=1                                                             |
| 34 | Psoriasis                                                                               | No=0; Yes=1                                                             |
| 35 | Any cancer diagnosis                                                                    | No=0; Yes=1                                                             |
| 36 | Multiple cancers diagnosed                                                              | No/single cancer=0; Multiple cancers=1                                  |
| 37 | Chest pain                                                                              | No=0; Yes=1                                                             |
| 38 | Head and/or neck pain                                                                   | No=0; Yes=1                                                             |
| 39 | Back pain                                                                               | No=0; Yes=1                                                             |
| 40 | Stomach/abdominal pain                                                                  | No=0; Yes=1                                                             |
| 41 | Hip pain                                                                                | No=0; Yes=1                                                             |
| 42 | Knee pain                                                                               | No=0; Yes=1                                                             |
| 43 | Whole-body pain                                                                         | No=0; Yes=1                                                             |
| 44 | Facial pain                                                                             | No=0; Yes=1                                                             |
| 45 | Sciatica                                                                                | No=0; Yes=1                                                             |
| 46 | Gastric reflux                                                                          | No=0; Yes=1                                                             |
| 47 | Hiatus hernia                                                                           | No=0; Yes=1                                                             |
| 48 | Gall stones                                                                             | No=0; Yes=1                                                             |
| 49 | Diverticulitis                                                                          | No=0; Yes=1                                                             |

**Supplementary Table S3.** List of the 109 ICD-10 codes and assigned weights for construction of the Hospital Frailty Risk Score

| #  | ICD-10 code | Description                                                                                            | Weight |
|----|-------------|--------------------------------------------------------------------------------------------------------|--------|
| 1  | F00         | Dementia in Alzheimer's disease                                                                        | 7.1    |
| 2  | G81         | Hemiplegia                                                                                             | 4.4    |
| 3  | G30         | Alzheimer's disease                                                                                    | 4.0    |
| 4  | I69         | Sequelae of cerebrovascular disease (secondary codes)                                                  | 3.7    |
| 5  | R29         | Other symptoms and signs involving the nervous and musculoskeletal systems (R29.6<br>Tendency to fall) | 3.6    |
| 6  | N39         | Other disorders of urinary system (includes urinary tract infection and urinary<br>incontinence)       | 3.2    |
| 7  | F05         | Delirium, not induced by alcohol and other psychoactive substances                                     | 3.2    |
| 8  | W19         | Unspecified fall                                                                                       | 3.2    |
| 9  | S00         | Superficial injury of head                                                                             | 3.2    |
| 10 | R31         | Unspecified hematuria                                                                                  | 3.0    |
| 11 | B96         | Other bacterial agents as the cause of diseases classified to other chapters (secondary<br>code)       | 2.9    |
| 12 | R41         | Other symptoms and signs involving cognitive functions and awareness                                   | 2.7    |
| 13 | R26         | Abnormalities of gait and mobility                                                                     | 2.6    |
| 14 | I67         | Other cerebrovascular diseases                                                                         | 2.6    |
| 15 | R56         | Convulsions, not elsewhere classified                                                                  | 2.6    |
| 16 | R40         | Somnolence, stupor and coma                                                                            | 2.5    |
| 17 | T83         | Complications of genitourinary prosthetic devices, implants and grafts                                 | 2.4    |
| 18 | S06         | Intracranial injury                                                                                    | 2.4    |
| 19 | S42         | Fracture of shoulder and upper arm                                                                     | 2.3    |
| 20 | E87         | Other disorders of fluid, electrolyte and acid- base balance                                           | 2.3    |
| 21 | M25         | Other joint disorders, not elsewhere classified                                                        | 2.3    |
| 22 | E86         | Volume depletion                                                                                       | 2.3    |
| 23 | R54         | Senility                                                                                               | 2.2    |
| 24 | Z50         | Care involving use of rehabilitation procedures                                                        | 2.1    |
| 25 | F03         | Unspecified dementia                                                                                   | 2.1    |
| 26 | W18         | Other fall on same level                                                                               | 2.1    |
| 27 | Z75         | Problems related to medical facilities and other health care                                           | 2.0    |
| 28 | F01         | Vascular dementia                                                                                      | 2.0    |
| 29 | S80         | Superficial injury of lower leg                                                                        | 2.0    |
| 30 | L03         | Cellulitis                                                                                             | 2.0    |
| 31 | H54         | Blindness and low vision                                                                               | 1.9    |
| 32 | E53         | Deficiency of other B group vitamins                                                                   | 1.9    |
| 33 | Z60         | Problems related to social environment                                                                 | 1.8    |
| 34 | G20         | Parkinson's disease                                                                                    | 1.8    |
| 35 | R55         | Syncope and collapse                                                                                   | 1.8    |
| 36 | S22         | Fracture of rib(s), sternum and thoracic spine                                                         | 1.8    |
| 37 | K59         | Other functional intestinal disorders                                                                  | 1.8    |
| 38 | N17         | Acute renal failure                                                                                    | 1.8    |
| 39 | L89         | Decubitus ulcer                                                                                        | 1.7    |
| 40 | Z22         | Carrier of infectious disease                                                                          | 1.7    |
| 41 | B95         | Streptococcus and staphylococcus as the cause of diseases classified to other chapters                 | 1.7    |
| 42 | L97         | Ulcer of lower limb, not elsewhere classified                                                          | 1.6    |
| 43 | R44         | Other symptoms and signs involving general sensations and perceptions                                  | 1.6    |
| 44 | K26         | Duodenal ulcer                                                                                         | 1.6    |
| 45 | I95         | Hypotension                                                                                            | 1.6    |
| 46 | N19         | Unspecified renal failure                                                                              | 1.6    |
| 47 | A41         | Other septicemia                                                                                       | 1.6    |
| 48 | Z87         | Personal history of other diseases and conditions                                                      | 1.5    |
| 49 | J96         | Respiratory failure, not elsewhere classified                                                          | 1.5    |
| 50 | X59         | Exposure to unspecified factor                                                                         | 1.5    |
| 51 | M19         | Other arthrosis                                                                                        | 1.5    |
| 52 | G40         | Epilepsy                                                                                               | 1.5    |
| 53 | M81         | Osteoporosis without pathological fracture                                                             | 1.4    |

**Supplementary Table S3. (continued)**

| #   | ICD-10 code | Description                                                               | Weight |
|-----|-------------|---------------------------------------------------------------------------|--------|
| 54  | S72         | Fracture of femur                                                         | 1.4    |
| 55  | S32         | Fracture of lumbar spine and pelvis                                       | 1.4    |
| 56  | E16         | Other disorders of pancreatic internal secretion                          | 1.4    |
| 57  | R94         | Abnormal results of function studies                                      | 1.4    |
| 58  | N18         | Chronic renal failure                                                     | 1.4    |
| 59  | R33         | Retention of urine                                                        | 1.3    |
| 60  | R69         | Unknown and unspecified causes of morbidity                               | 1.3    |
| 61  | N28         | Other disorders of kidney and ureter, not elsewhere classified            | 1.3    |
| 62  | R32         | Unspecified urinary incontinence                                          | 1.2    |
| 63  | G31         | Other degenerative diseases of nervous system, not elsewhere classified   | 1.2    |
| 64  | Y95         | Nosocomial condition                                                      | 1.2    |
| 65  | S09         | Other and unspecified injuries of head                                    | 1.2    |
| 66  | R45         | Symptoms and signs involving emotional state                              | 1.2    |
| 67  | G45         | Transient cerebral ischemic attacks and related syndromes                 | 1.2    |
| 68  | Z74         | Problems related to care-provider dependency                              | 1.1    |
| 69  | M79         | Other soft tissue disorders, not elsewhere classified                     | 1.1    |
| 70  | W06         | Fall involving bed                                                        | 1.1    |
| 71  | S01         | Open wound of head                                                        | 1.1    |
| 72  | A04         | Other bacterial intestinal infections                                     | 1.1    |
| 73  | A09         | Diarrhea and gastroenteritis of presumed infectious origin                | 1.1    |
| 74  | J18         | Pneumonia, organism unspecified                                           | 1.1    |
| 75  | J69         | Pneumonitis due to solids and liquids                                     | 1.0    |
| 76  | R47         | Speech disturbances, not elsewhere classified                             | 1.0    |
| 77  | E55         | Vitamin D deficiency                                                      | 1.0    |
| 78  | Z93         | Artificial opening status                                                 | 1.0    |
| 79  | R02         | Gangrene, not elsewhere classified                                        | 1.0    |
| 80  | R63         | Symptoms and signs concerning food and fluid intake                       | 0.9    |
| 81  | H91         | Other hearing loss                                                        | 0.9    |
| 82  | W10         | Fall on and from stairs and steps                                         | 0.9    |
| 83  | W01         | Fall on same level from slipping, tripping and stumbling                  | 0.9    |
| 84  | E05         | Thyrotoxicosis [hyperthyroidism]                                          | 0.9    |
| 85  | M41         | Scoliosis                                                                 | 0.9    |
| 86  | R13         | Dysphagia                                                                 | 0.8    |
| 87  | Z99         | Dependence on enabling machines and devices                               | 0.8    |
| 88  | U80         | Agent resistant to penicillin and related antibiotics                     | 0.8    |
| 89  | M80         | Osteoporosis with pathological fracture                                   | 0.8    |
| 90  | K92         | Other diseases of digestive system                                        | 0.8    |
| 91  | I63         | Cerebral Infarction                                                       | 0.8    |
| 92  | N20         | Calculus of kidney and ureter                                             | 0.7    |
| 93  | F10         | Mental and behavioral disorders due to use of alcohol                     | 0.7    |
| 94  | Y84         | Other medical procedures as the cause of abnormal reaction of the patient | 0.7    |
| 95  | R00         | Abnormalities of heartbeat                                                | 0.7    |
| 96  | J22         | Unspecified acute lower respiratory infection                             | 0.7    |
| 97  | Z73         | Problems related to life-management difficulty                            | 0.6    |
| 98  | R79         | Other abnormal findings of blood chemistry                                | 0.6    |
| 99  | Z91         | Personal history of risk-factors, not elsewhere classified                | 0.5    |
| 100 | S51         | Open wound of forearm                                                     | 0.5    |
| 101 | F32         | Depressive episode                                                        | 0.5    |
| 102 | M48         | Spinal stenosis (secondary code only)                                     | 0.5    |
| 103 | E83         | Disorders of mineral metabolism                                           | 0.4    |
| 104 | M15         | Polyarthritis                                                             | 0.4    |
| 105 | D64         | Other anemias                                                             | 0.4    |
| 106 | L08         | Other local infections of skin and subcutaneous tissue                    | 0.4    |
| 107 | R11         | Nausea and vomiting                                                       | 0.3    |
| 108 | K52         | Other noninfective gastroenteritis and colitis                            | 0.3    |
| 109 | R50         | Fever of unknown origin                                                   | 0.1    |

Abbreviation: *ICD-10*, International Statistical Classification of Diseases and Related Health Problems, Tenth Revision

**Supplementary Table S4.** List of the 17 comorbidities, assigned weights and associated ICD-10 codes for construction of Charlson Comorbidity Index

| #  | Condition                           | ICD-10 code                                        | Weight |
|----|-------------------------------------|----------------------------------------------------|--------|
| 1  | Myocardial infarction               | I21, I22, I25.2                                    | 1      |
| 2  | Congestive heart failure            | I50                                                | 1      |
| 3  | Peripheral vascular disease         | I71, I73.9, I79.0, R02, Z95.8, Z95.9               | 1      |
| 4  | Cerebral vascular disease           | G45, G46, I60–I64, I67–I69                         | 1      |
| 5  | Dementia                            | F00–F02, F05.1                                     | 1      |
| 6  | Pulmonary disease                   | J40–J47, J60–J67                                   | 1      |
| 7  | Connective tissue disorder          | M05, M06, M32–M34, M35.3                           | 1      |
| 8  | Peptic ulcer                        | K25–K28                                            | 1      |
| 9  | Liver disease                       | K70.2, K70.3, K71.7, K73, K74                      | 1      |
| 10 | Diabetes                            | E10–E14, excluding subdivisions 2–5                | 1      |
| 11 | Diabetes complications              | E10–E14, subdivisions 2–5                          | 2      |
| 12 | Paraplegia                          | G04.1, G81, G82                                    | 2      |
| 13 | Renal disease                       | N01, N03, N18, N19, N25, N05.2–N05.6, N07.2–N07.4, | 2      |
| 14 | Cancer                              | C00–C41, C43, C45–C76, C81–C85, C88, C90–C97       | 2      |
| 15 | Metastatic cancer                   | C77–C80                                            | 3      |
| 16 | Severe liver disease                | K72.1, K72.9, K76.6, K76.7                         | 3      |
| 17 | Acquired immune deficiency syndrome | B20–B24                                            | 6      |

Abbreviations: *ICD-10*, International Statistical Classification of Diseases and Related Health Problems, Tenth Revision



**Supplementary Table S5.** Characteristics of individuals with and without hospital data

| Characteristic                       | With hospital data<br>(n=354,268) | Without hospital data <sup>a</sup><br>(n=55,931) | <i>p</i> <sup>b</sup> |
|--------------------------------------|-----------------------------------|--------------------------------------------------|-----------------------|
| Deaths, n (%)                        | 3,144 (0.9)                       | 42 (0.1)                                         | <0.001                |
| Age (year), mean $\pm$ SD            | 68.0 $\pm$ 8.1                    | 65.0 $\pm$ 7.7                                   | <0.001                |
| Age category, n (%)                  |                                   |                                                  | <0.001                |
| <65                                  | 124,902 (35.3)                    | 27,749 (49.6)                                    |                       |
| 65–74                                | 147,627 (41.7)                    | 22,021 (39.4)                                    |                       |
| $\geq$ 75                            | 81,739 (23.1)                     | 6,161 (11.0)                                     |                       |
| Sex, n (%)                           |                                   |                                                  | <0.001                |
| Female                               | 197,432 (55.7)                    | 28,586 (51.1)                                    |                       |
| Male                                 | 156,836 (44.3)                    | 27,345 (48.9)                                    |                       |
| Ethnicity, n (%)                     |                                   |                                                  | <0.001                |
| White                                | 333,290 (94.4)                    | 52,067 (93.4)                                    |                       |
| Asian                                | 8,185 (2.3)                       | 1,546 (2.8)                                      |                       |
| Black                                | 6,197 (1.8)                       | 1,080 (1.9)                                      |                       |
| Others                               | 5,400 (1.5)                       | 1,041 (1.9)                                      |                       |
| Smoking status, n (%)                |                                   |                                                  | <0.001                |
| Never                                | 192,891 (54.6)                    | 34,685 (62.2)                                    |                       |
| Previous                             | 124,964 (35.4)                    | 16,235 (29.1)                                    |                       |
| Current                              | 35,142 (10.0)                     | 4,869 (8.7)                                      |                       |
| Education, n (%)                     |                                   |                                                  | <0.001                |
| Low                                  | 60,138 (17.2)                     | 5,155 (9.3)                                      |                       |
| Intermediate                         | 179,642 (51.2)                    | 27,362 (49.3)                                    |                       |
| High                                 | 110,910 (31.6)                    | 22,992 (41.4)                                    |                       |
| Income, n (%)                        |                                   |                                                  | <0.001                |
| <£18,000                             | 69,392 (23.0)                     | 6,766 (13.7)                                     |                       |
| £18,000–30,999                       | 78,696 (26.0)                     | 10,408 (21.1)                                    |                       |
| £31,000–51,999                       | 79,159 (26.2)                     | 13,808 (28.0)                                    |                       |
| $\geq$ £52,000                       | 75,079 (24.8)                     | 18,300 (37.1)                                    |                       |
| Townsend deprivation quintile, n (%) |                                   |                                                  | <0.001                |
| 1 (least deprived)                   | 70,422 (19.9)                     | 11,934 (21.4)                                    |                       |
| 2                                    | 72,140 (20.4)                     | 11,604 (20.8)                                    |                       |
| 3                                    | 71,409 (20.2)                     | 11,259 (20.2)                                    |                       |
| 4                                    | 70,930 (20.0)                     | 11,172 (20.0)                                    |                       |
| 5 (most deprived)                    | 68,960 (19.5)                     | 9,890 (17.7)                                     |                       |
| Baseline PFP, n (%)                  |                                   |                                                  | <0.001                |
| Non-frail                            | 200,997 (56.7)                    | 37,644 (67.3)                                    |                       |
| Pre-frail                            | 140,037 (39.5)                    | 17,676 (31.6)                                    |                       |
| Frail                                | 13,234 (3.7)                      | 611 (1.1)                                        |                       |
| Baseline FI, n (%)                   |                                   |                                                  | <0.001                |
| Relatively fit                       | 18,262 (5.2)                      | 6,742 (12.1)                                     |                       |
| Less fit                             | 127,287 (35.9)                    | 29,051 (51.9)                                    |                       |
| Least fit                            | 162,490 (45.9)                    | 18,523 (33.1)                                    |                       |
| Frail                                | 46,229 (13.1)                     | 1,615 (2.9)                                      |                       |

<sup>a</sup> Resided in England at baseline and without hospital data between 1980 and 2020

<sup>b</sup> Based on t-tests for continuous variables and  $\chi^2$ -tests for categorical variables

Abbreviations: *FI*, frailty index; *PFP*, physical frailty phenotype; *SD*, standard deviation

**Supplementary Table S6.** Spearman’s rank correlation coefficients among different frailty and comorbidity measures

| Variable                     | Baseline PFP | Baseline FI | Baseline HFRS | Baseline CCI | Concurrent HFRS | Concurrent CCI |
|------------------------------|--------------|-------------|---------------|--------------|-----------------|----------------|
| Baseline PFP <sup>a,b</sup>  | 1            |             |               |              |                 |                |
| Baseline FI <sup>b</sup>     | 0.338*       | 1           |               |              |                 |                |
| Baseline HFRS <sup>b</sup>   | 0.131*       | 0.213*      | 1             |              |                 |                |
| Baseline CCI <sup>b</sup>    | 0.132*       | 0.235*      | 0.326*        | 1            |                 |                |
| Concurrent HFRS <sup>b</sup> | 0.120*       | 0.199*      | 0.161*        | 0.139*       | 1               |                |
| Concurrent CCI <sup>b</sup>  | 0.128*       | 0.224*      | 0.143*        | 0.229*       | 0.551*          | 1              |

<sup>a</sup> PFP is considered as a continuous variable of the total score across the five criteria (score ranges from 0 to 5)

<sup>b</sup> Baseline PFP, FI, HFRS, and CCI were calculated using data at the UK Biobank baseline, and concurrent HFRS and CCI using data at the time of the COVID-19 pandemic

\*  $p < 0.001$

Abbreviations: *CCI*, Charlson Comorbidity Index; *FI*, frailty index; *HFRS*, hospital frailty risk score; *PFP*, physical frailty phenotype

**Supplementary Table S7.** Associations of the different frailty and comorbidity measures with being COVID-19 positive and COVID-19 inpatient

| Model <sup>a</sup>           |                   | COVID-19 positive<br>OR (95% CI) | COVID-19 inpatient<br>OR (95% CI) |
|------------------------------|-------------------|----------------------------------|-----------------------------------|
| Baseline PFP <sup>b</sup>    | Non-frail         | 1                                | 1                                 |
|                              | Pre-frail         | 1.25 (1.19–1.31)*                | 1.57 (1.45–1.70)*                 |
|                              | Frail             | 1.96 (1.77–2.17)*                | 3.67 (3.20–4.20)*                 |
| Baseline FI <sup>b</sup>     | Relatively fit    | 1                                | 1                                 |
|                              | Less fit          | 1.11 (0.99–1.23)                 | 1.43 (1.14–1.79)*                 |
|                              | Least fit         | 1.35 (1.22–1.50)*                | 2.19 (1.75–2.74)*                 |
|                              | Frail             | 2.05 (1.82–2.30)*                | 4.49 (3.57–5.66)*                 |
| Baseline HFRS <sup>b</sup>   | Low risk          | 1                                | 1                                 |
|                              | Intermediate risk | 1.91 (1.67–2.19)*                | 2.94 (2.48–3.48)*                 |
|                              | High risk         | 3.43 (2.00–5.89)*                | 7.16 (4.00–12.82)*                |
| Baseline CCI <sup>b</sup>    | Continuous        | 1.23 (1.20–1.27)*                | 1.41 (1.36–1.46)*                 |
| Concurrent HFRS <sup>b</sup> | Low risk          | 1                                | 1                                 |
|                              | Intermediate risk | 2.23 (2.03–2.45)*                | 3.84 (3.41–4.31)*                 |
|                              | High risk         | 9.02 (8.10–10.04)*               | 15.25 (13.45–17.30)*              |
| Concurrent CCI <sup>b</sup>  | Continuous        | 1.30 (1.28–1.32)*                | 1.47 (1.44–1.50)*                 |

<sup>a</sup> All models were adjusted for age (continuous) and sex

<sup>b</sup> Baseline PFP, FI, HFRS, and CCI were calculated using data at the UK Biobank baseline, and concurrent HFRS and CCI using data at the time of the COVID-19 pandemic

\* Significant with a false discovery rate corrected significance level at 0.048

Abbreviations: *CCI*, Charlson Comorbidity Index; *CI*, confidence interval; *FI*, frailty index; *HFRS*, Hospital Frailty Risk Score; *OR*, odds ratio; *PFP*, physical frailty phenotype

**Supplementary Table S8.** Predictive accuracies of age, sex, frailty and comorbidity measures for COVID-19 mortality in the full sample and COVID-19 inpatients

| Model                                      | Full sample (n=410,199) |                      |                       | COVID-19 inpatients (n=2,812) <sup>a</sup> |                      |                       |
|--------------------------------------------|-------------------------|----------------------|-----------------------|--------------------------------------------|----------------------|-----------------------|
|                                            | AUC (95% CI)            | % diff. with model 1 | <i>p</i> <sup>b</sup> | AUC (95% CI)                               | % diff. with model 1 | <i>p</i> <sup>b</sup> |
| 1 Age + sex                                | 0.77 (0.76–0.79)        | -                    | -                     | 0.71 (0.69–0.74)                           | -                    | -                     |
| 2 Age + sex + baseline PFP <sup>c</sup>    | 0.79 (0.77–0.81)        | +1.6%                | <0.001                | 0.71 (0.69–0.74)                           | +0.1%                | 0.61                  |
| 3 Age + sex + baseline FI <sup>c</sup>     | 0.79 (0.78–0.81)        | +2.0%                | <0.001                | 0.71 (0.69–0.74)                           | +0.1%                | 0.63                  |
| 4 Age + sex + baseline HFRS <sup>c</sup>   | 0.78 (0.76–0.80)        | +0.4%                | 0.019                 | 0.71 (0.69–0.74)                           | +0.2%                | 0.33                  |
| 5 Age + sex + baseline CCI <sup>c</sup>    | 0.79 (0.77–0.81)        | +1.4%                | <0.001                | 0.72 (0.69–0.74)                           | +0.2%                | 0.11                  |
| 6 Age + sex + concurrent HFRS <sup>c</sup> | 0.83 (0.81–0.85)        | +5.2%                | <0.001                | 0.72 (0.69–0.74)                           | +0.5%                | 0.16                  |
| 7 Age + sex + concurrent CCI <sup>c</sup>  | 0.83 (0.82–0.85)        | +6.0%                | <0.001                | 0.73 (0.71–0.75)                           | +1.6%                | 0.004                 |

<sup>a</sup> The COVID-19 inpatient subsample is nested within the full sample

<sup>b</sup> *p*-values for pairwise comparisons with model 1

<sup>c</sup> Baseline PFP, FI, HFRS, and CCI were calculated using data at the UK Biobank baseline, and concurrent HFRS and CCI using data at the time of the COVID-19 pandemic

Abbreviations: *AUC*, area under the receiver operating characteristic curves; *CCI*, Charlson Comorbidity Index; *CI*, confidence interval; *FI*, frailty index; *HFRS*, Hospital Frailty Risk Score; *PFP*, physical frailty phenotype

**Supplementary Table S9.** Associations of the different frailty and comorbidity measures with mortality due to COVID-19 and other causes in the full sample and COVID-19 inpatients

| Model <sup>a</sup>              |                   | Full sample (n=410,199)           |                                          | COVID-19 inpatients (n=2,812) <sup>b</sup> |                                          |
|---------------------------------|-------------------|-----------------------------------|------------------------------------------|--------------------------------------------|------------------------------------------|
|                                 |                   | COVID-19 mortality<br>OR (95% CI) | Other deaths <sup>c</sup><br>OR (95% CI) | COVID-19 mortality<br>OR (95% CI)          | Other deaths <sup>c</sup><br>OR (95% CI) |
| Baseline<br>PFP <sup>d</sup>    | Non-frail         | 1                                 | 1                                        | 1                                          | 1                                        |
|                                 | Pre-frail         | 1.69<br>(1.40–2.03)*              | 1.39<br>(1.28–1.50)*                     | 1.07<br>(0.85–1.35)                        | 1.23<br>(0.83–1.84)                      |
|                                 | Frail             | 4.37<br>(3.24–5.90)*              | 3.02<br>(2.62–3.49)*                     | 1.35<br>(0.94–1.96)                        | 1.26<br>(0.65–2.44)                      |
| Baseline<br>FI <sup>d</sup>     | Relatively fit    | 1                                 | 1                                        | 1                                          | 1                                        |
|                                 | Less fit          | 1.64<br>(0.89–3.04)               | 1.08<br>(0.88–1.34)                      | 1.06<br>(0.50–2.27)                        | 0.48<br>(0.17–1.32)                      |
|                                 | Least fit         | 2.33<br>(1.27–4.28)*              | 1.43<br>(1.16–1.76)*                     | 0.95<br>(0.45–2.00)                        | 0.56<br>(0.21–1.46)                      |
|                                 | Frail             | 5.27<br>(2.85–9.74)*              | 2.26<br>(1.82–2.80)*                     | 1.25<br>(0.59–2.67)                        | 0.57<br>(0.21–1.54)                      |
| Baseline<br>HFRS <sup>d</sup>   | Low risk          | 1                                 | 1                                        | 1                                          | 1                                        |
|                                 | Intermediate risk | 2.22<br>(1.48–3.32)*              | 2.50<br>(2.10–2.97)*                     | 0.72<br>(0.43–1.21)                        | 1.16<br>(0.55–2.46)                      |
|                                 | High risk         | 5.12<br>(1.26–20.79)*             | 4.21<br>(2.06–8.59)*                     | 0.49<br>(0.06–3.93)                        | No observation                           |
| Baseline<br>CCI <sup>d</sup>    | Continuous        | 1.47<br>(1.36–1.58)*              | 1.42<br>(1.37–1.47)*                     | 1.18<br>(1.06–1.31)*                       | 0.89<br>(0.70–1.14)                      |
| Concurrent<br>HFRS <sup>d</sup> | Low risk          | 1                                 | 1                                        | 1                                          | 1                                        |
|                                 | Intermediate risk | 5.41<br>(4.29–6.83)*              | 7.86<br>(7.14–8.65)*                     | 1.64<br>(1.21–2.21)*                       | 2.41<br>(1.48–3.92)*                     |
|                                 | High risk         | 24.17<br>(19.24–30.35)*           | 24.82<br>(22.23–27.72)*                  | 1.53<br>(1.13–2.08)*                       | 2.62<br>(1.63–4.22)*                     |
| Concurrent<br>CCI <sup>d</sup>  | Continuous        | 1.64<br>(1.58–1.70)*              | 1.85<br>(1.82–1.88)*                     | 1.21<br>(1.14–1.27)*                       | 1.32<br>(1.22–1.42)*                     |

<sup>a</sup> Associations were assessed using multinomial logistic regression models, in which “COVID-19 mortality” and “other deaths” were compared to those who were alive as of November 30, 2020. All models were adjusted for age (continuous) and sex

<sup>b</sup> The COVID-19 inpatient subsample is nested within the full sample

<sup>c</sup> Other deaths are individuals died between March 1 and November 30, 2020 whose primary and contributory causes of death do not include COVID-19

<sup>d</sup> Baseline PFP, FI, HFRS, and CCI were calculated using data at the UK Biobank baseline, and concurrent HFRS and CCI using data at the time of the COVID-19 pandemic

\* Significant with a false discovery rate corrected significance level at 0.031

Abbreviations: *CCI*, Charlson Comorbidity Index; *CI*, confidence interval; *FI*, frailty index; *HFRS*, Hospital Frailty Risk Score; *OR*, odds ratio; *PFP*, physical frailty phenotype
